# Supplementary material
Source: publisher figshare collection journal article supplement (https://f1000.figshare.com/ndownloader/files/1320533)
Supplement: Supplementary file 1 [file 1320533]

TIME (min)	ABSORB AT 450nm LIPOSOMES-PIPLC plus 10nM k579
0.00250000	0.376153022
0.00750000	0.377207398
0.01250000	0.377880335
0.01750000	0.377825528
0.02250000	0.379526138
0.02750000	0.379846394
0.03250000	0.379869461
0.03750000	0.382394314
0.04250000	0.383078396
0.04750000	0.381897092
0.05250000	0.382935613
0.05750000	0.384500146
0.06250001	0.383780181
0.06750000	0.386351824
0.07250001	0.385787994
0.07750000	0.38583681
0.08250000	0.387612402
0.08750001	0.389286786
0.09250000	0.388803303
0.09750000	0.390198112
0.10250000	0.390538812
0.10750000	0.390700072
0.11250000	0.391885638
0.11750000	0.391967237
0.12250001	0.392857492
0.12750001	0.393859416
0.13250001	0.395485938
0.13750000	0.395019114
0.14250000	0.39515385
0.14750001	0.397292346
0.15250000	0.396588624
0.15750001	0.39780286
0.16250001	0.399714083
0.16750000	0.398432702
0.17250000	0.39840582
0.17750001	0.400309175
0.18250002	0.39977479
0.18750001	0.401110679
0.19250001	0.401566237
0.19750001	0.401541203
0.20250002	0.402345508
0.20750001	0.404101074
0.21250002	0.40336293
0.21750002	0.40415585
0.22250001	0.40559265
0.22750001	0.404977441
0.23250002	0.405340552
0.23750001	0.406554431
0.24250002	0.406782746
0.24750000	0.406210363
0.25250000	0.408581287
0.25750002	0.40756911
0.26250002	0.407995194
0.26750001	0.410103917
0.27250001	0.409856796
0.27750003	0.409768105
0.28250000	0.411383987
0.28749999	0.410452843
0.29250002	0.411097169
0.29750001	0.412348479
0.30250004	0.412016422
0.30750000	0.412266433
0.31250003	0.414340198
0.31750003	0.413979769
0.32250002	0.413467199
0.32750002	0.414110988
0.33250001	0.414812625
0.33750004	0.414433092
0.34250003	0.414849997
0.34750000	0.415738285
0.35250002	0.415741384
0.35750002	0.416846365
0.36250004	0.416630745
0.36750001	0.416560441
0.37250000	0.418248743
0.37750003	0.417415738
0.38250002	0.417991966
0.38750002	0.419161141
0.39250001	0.41882661
0.39750001	0.417324185
0.40250003	0.419107705
0.40750000	0.419780076
0.41250002	0.419902802
0.41750002	0.420363545
0.42250001	0.421269834
0.42750004	0.420027316
0.43250000	0.421543032
0.43750003	0.421934396
0.44250003	0.421436697
0.44750005	0.422022909
0.45250002	0.422225118
0.45750001	0.422469348
0.46250004	0.423162818
0.46750003	0.42479068
0.47250003	0.423336178
0.47750002	0.423393697
0.48250002	0.425082982
0.48750004	0.423908234
0.49250001	0.424337477
0.49750003	0.424607545
0.50250000	0.4244681
0.50749999	0.424327731
0.51250005	0.426371813
0.51750004	0.425392062
0.52250004	0.425402999
0.52750003	0.426283389
0.53250003	0.426395506
0.53750002	0.425582558
0.54250008	0.428285301
0.54750001	0.42856279
0.55250001	0.426543474
0.55750000	0.428270936
0.56250000	0.427747667
0.56750005	0.427967638
0.57250005	0.428991139
0.57750005	0.429110676
0.58250004	0.428386837
0.58749998	0.429757536
0.59250003	0.429606259
0.59750003	0.429072529
0.60250002	0.429895937
0.60750002	0.430719286
0.61250007	0.429620296
0.61750007	0.430679441
0.62250006	0.430352211
0.62750000	0.429194838
0.63249999	0.430220962
0.63750005	0.432089061
0.64250004	0.42995283
0.64750004	0.431056351
0.65250003	0.431563824
0.65750003	0.430510163
0.66250008	0.431805849
0.66750008	0.431508929
0.67250001	0.431512117
0.67750001	0.432213098
0.68250000	0.433877081
0.68750006	0.431166202
0.69250005	0.433050215
0.69750005	0.432630301
0.70250005	0.431646794
0.70750004	0.43275699
0.71250004	0.433371633
0.71750003	0.433045059
0.72250003	0.433595449
0.72750002	0.433877885
0.73250002	0.432914257
0.73750007	0.433294922
0.74250007	0.43435809
0.74750006	0.433540255
0.75250000	0.433986247
0.75749999	0.434785157
0.76250005	0.433906227
0.76750004	0.434242427
0.77250004	0.435404062
0.77750003	0.435724974
0.78250003	0.434287071
0.78750008	0.435843468
0.79250008	0.434957176
0.79750001	0.435426682
0.80250001	0.436541021
0.80750000	0.43459627
0.81250006	0.434921205
0.81750005	0.436749429
0.82250005	0.436355263
0.82750005	0.435696483
0.83250004	0.436435401
0.83750004	0.436306804
0.84250003	0.435236245
0.84750003	0.43697086
0.85250002	0.436525703
0.85750008	0.435875177
0.86250007	0.437348366
0.86750007	0.436226577
0.87250006	0.436731756
0.87750000	0.437279075
0.88250005	0.437088221
0.88750005	0.437370479
0.89250004	0.437763542
0.89750004	0.437930256
0.90250003	0.43689251
0.90750009	0.438245297
0.91250008	0.437380999
0.91750008	0.437705874
0.92250001	0.438850105
0.92750001	0.437948614
0.93250006	0.437223464
0.93750006	0.437763363
0.94250005	0.438673675
0.94750005	0.43729794
0.95250005	0.438070864
0.95750010	0.437746048
0.96250004	0.437795639
0.96750003	0.439090788
0.97250003	0.438975304
0.97750002	0.438176066
0.98250008	0.439176589
0.98750007	0.43924734
0.99250007	0.438260168
0.99750006	0.438910753
1.00250006	0.440343767
1.00750005	0.438417465
1.01250005	0.439935535
1.01750004	0.43947503
1.02250004	0.438553512
1.02750003	0.439329356
1.03250003	0.439560384
1.03750002	0.438930959
1.04250002	0.43995139
1.04750001	0.440116495
1.05250001	0.438979894
1.05750012	0.440341771
1.06250012	0.440126151
1.06750000	0.4394494
1.07250011	0.43973276
1.07749999	0.441284686
1.08250010	0.439374745
1.08749998	0.440865815
1.09250009	0.44112742
1.09750009	0.439802259
1.10250008	0.44023183
1.10750008	0.440972537
1.11249995	0.440239072
1.11750007	0.44070375
1.12250006	0.440976024
1.12750006	0.44031027
1.13250005	0.439609289
1.13750005	0.441853643
1.14250004	0.440243989
1.14750016	0.439952374
1.15250003	0.442438364
1.15750003	0.440250605
1.16250002	0.440457195
1.16750002	0.442054987
1.17250013	0.441721767
1.17750001	0.440277576
1.18250012	0.442803443
1.18750000	0.440160275
1.19250000	0.441122323
1.19750011	0.441740125
1.20249999	0.441253752
1.20750010	0.441501528
1.21249998	0.442744374
1.21750009	0.442172885
1.22250009	0.440653026
1.22750008	0.442319632
1.23250008	0.441831768
1.23750007	0.441690147
1.24250007	0.442079246
1.24750006	0.441564739
1.25250006	0.441123426
1.25750005	0.44243449
1.26250017	0.443049133
1.26750004	0.441212297
1.27250016	0.442844868
1.27750003	0.441566706
1.28250003	0.441028267
1.28750014	0.441254467
1.29250002	0.442882478
1.29750013	0.442065388
1.30250001	0.442018241
1.30750012	0.443006337
1.31250012	0.442222059
1.31750000	0.442734242
1.32250011	0.44306162
1.32749999	0.441557497
1.33250010	0.442968518
1.33750010	0.442429274
1.34250009	0.441704989
1.34750009	0.442881286
1.35250008	0.442899227
1.35750008	0.442494273
1.36250007	0.44323808
1.36750007	0.443539798
1.37250006	0.441948086
1.37750006	0.443245173
1.38250005	0.442214042
1.38750017	0.442517549
1.39250004	0.443392634
1.39750016	0.443499535
1.40250003	0.442117006
1.40750003	0.443086952
1.41250014	0.443545312
1.41750002	0.443145931
1.42250013	0.442613453
1.42750001	0.444406182
1.43250012	0.44239676
1.43750012	0.442636877
1.44250000	0.444132954
1.44750011	0.442903966
1.45249999	0.443264037
1.45750010	0.444061488
1.46250010	0.441887021
1.46750009	0.443154275
1.47250009	0.444349825
1.47750008	0.444219083
1.48250008	0.443521708
1.48750007	0.444831014
1.49250007	0.443487793
1.49750006	0.443655372
1.50250006	0.444580406
1.50750005	0.443699569
1.51250017	0.443356991
1.51750004	0.44467181
1.52250016	0.443999797
1.52750003	0.443699718
1.53250003	0.445468515
1.53750014	0.443790525
1.54250002	0.443135619
1.54750013	0.444291651
1.55250001	0.4440687
1.55750012	0.443438262
1.56250012	0.445196599
1.56750000	0.444704354
1.57250011	0.443319976
1.57749999	0.444927841
1.58250010	0.444747865
1.58750010	0.443921745
1.59250009	0.44566235
1.59750009	0.444475144
1.60250008	0.443777531
1.60750008	0.444732845
1.61250007	0.444871336
1.61750007	0.44402957
1.62250006	0.44546631
1.62750006	0.444168061
1.63250005	0.443636
1.63750017	0.445519239
1.64250004	0.444789261
1.64750016	0.443928868
1.65250003	0.444602162
1.65750003	0.445029557
1.66250014	0.443842262
1.66750002	0.445845127
1.67250013	0.444837153
1.67750001	0.443238527
1.68250012	0.445000321
1.68750012	0.444341362
1.69250000	0.443992943
1.69750011	0.444747061
1.70249999	0.445475936
1.70750010	0.444637656
1.71250010	0.444542795
1.71750009	0.445814133
1.72250009	0.444364101
1.72750020	0.445182711
1.73250008	0.444913745
1.73750007	0.444449574
1.74250007	0.444977194
1.74750006	0.444967061
1.75250018	0.444399566
1.75750005	0.444747567
1.76250017	0.444610536
1.76750004	0.44366613
1.77250016	0.444972664
1.77750015	0.445783794
1.78250003	0.444737196
1.78750014	0.445071667
1.79250002	0.445213527
1.79750013	0.445178807
1.80250013	0.444607586
1.80750012	0.446560621
1.81250012	0.444198012
1.81750000	0.444685429
1.82250011	0.444909245
1.82750011	0.445215106
1.83250010	0.444671392
1.83750010	0.445784301
1.84250009	0.445396036
1.84750009	0.445644975
1.85250020	0.446614653
1.85750008	0.445342839
1.86250007	0.445279896
1.86750007	0.446512222
1.87250006	0.445715994
1.87750018	0.445207954
1.88250005	0.445358068
1.88750017	0.445940614
1.89250004	0.445266336
1.89750016	0.44634822
1.90250015	0.445563346
1.90750003	0.445462644
1.91250014	0.446187526
1.91750002	0.445771575
1.92250013	0.444625884
1.92750013	0.446197748
1.93250012	0.445177615
1.93750012	0.445355594
1.94250000	0.445268333
1.94750011	0.446180135
1.95250011	0.44478488
1.95750010	0.44541657
1.96250010	0.446680963
1.96750009	0.445404351
1.97250009	0.446133018
1.97750020	0.445558518
1.98250008	0.445611805
1.98750007	0.445565969
1.99250007	0.446157754
1.99750006	0.445528179
2.00250006	0.446844608
2.00750017	0.446643174
2.01250005	0.444745183
2.01750016	0.44569695
2.02250004	0.44590053
2.02750015	0.445307881
2.03250003	0.446155608
2.03750014	0.446111381
2.04250002	0.445138842
2.04750013	0.445732623
2.05250025	0.445804179
2.05750012	0.445676655
2.06250024	0.446794421
2.06750011	0.445879608
2.07249999	0.445685804
2.07750011	0.445541412
2.08249998	0.447255075
2.08750010	0.4451572
2.09249997	0.446049064
2.09750009	0.447439432
2.10250020	0.445533872
2.10750008	0.445959181
2.11250019	0.446911156
2.11750007	0.446466684
2.12250018	0.446583659
2.12750006	0.446294069
2.13250017	0.444980741
2.13750005	0.446240783
2.14250016	0.447262943
2.14750004	0.446570516
2.15250015	0.446101338
2.15750027	0.446909666
2.16249991	0.445566893
2.16750002	0.445485383
2.17250013	0.446849257
2.17750025	0.446048737
2.18250012	0.445636153
2.18750000	0.447744668
2.19250011	0.445955396
2.19749999	0.4461191
2.20250011	0.446908981
2.20750022	0.445640534
2.21250010	0.44607541
2.21749997	0.447687775
2.22250009	0.446716875
2.22750020	0.445626319
2.23250032	0.447663426
2.23749995	0.447348952
2.24250007	0.445681661
2.24750018	0.447167695
2.25250006	0.446987033
2.25750017	0.446504057
2.26250005	0.448583156
2.26750016	0.446528703
2.27250004	0.446330637
2.27750015	0.446874559
2.28250027	0.447953731
2.28749991	0.445977181
2.29250002	0.446946949
2.29750013	0.446786344
2.30250025	0.446398437
2.30750012	0.447279453
2.31250000	0.446157932
2.31750011	0.445134491
2.32249999	0.447322726
2.32750011	0.446674556
2.33250022	0.445581496
2.33750010	0.446927011
2.34249997	0.447028309
2.34750009	0.446335465
2.35250020	0.447614789
2.35750032	0.446340889
2.36249995	0.445914775
2.36750007	0.447132796
2.37250018	0.447259545
2.37750006	0.445943266
2.38250017	0.447004348
2.38750005	0.447592765
2.39250016	0.44575128
2.39750004	0.446792215
2.40250015	0.446958631
2.40750027	0.44578138
2.41249991	0.447464556
2.41750002	0.447002441
2.42250013	0.445851922
2.42750025	0.447152972
2.43250012	0.446474016
2.43750000	0.446106106
2.44250011	0.447202802
2.44749999	0.447255313
2.45250011	0.446234107
2.45750022	0.446698397
2.46250033	0.447591305
2.46749997	0.445933461
2.47250009	0.446750075
2.47750020	0.446863025
2.48250032	0.446340531
2.48750019	0.446300447
2.49250007	0.44787696
2.49750018	0.446573645
2.50250006	0.446565867
2.50750017	0.447540999
2.51250029	0.447489679
2.51750016	0.446237862
2.52250004	0.447628081
2.52750015	0.446418673
2.53250027	0.446394533
2.53750014	0.447193176
2.54250002	0.44674471
2.54750013	0.446378708
2.55250025	0.447950482
2.55750012	0.446666151
2.56250024	0.445886105
2.56750011	0.448071033
2.57249999	0.44686982
2.57750011	0.447144598
2.58250022	0.447741628
2.58750033	0.4471744
2.59249997	0.445994347
2.59750009	0.447046727
2.60250020	0.44739604
2.60750032	0.446158826
2.61250019	0.447743803
2.61750007	0.447109669
2.62250018	0.446591944
2.62750006	0.447617769
2.63250017	0.44806087
2.63750029	0.446539342
2.64250016	0.448553145
2.64750004	0.446868449
2.65250015	0.446677238
2.65750027	0.448621452
2.66250014	0.447759301
2.66750002	0.446847975
2.67250013	0.447794616
2.67750025	0.44784376
2.68250012	0.446661055
2.68750024	0.448125631
2.69250011	0.447740793
2.69749999	0.446543783
2.70250011	0.447115839
2.70750022	0.447615445
2.71250033	0.446388573
2.71749997	0.44742465
2.72250009	0.447956771
2.72750020	0.447087944
2.73250032	0.447725296
2.73750019	0.44864282
2.74250007	0.446818739
2.74750018	0.447789908
2.75250006	0.44836551
2.75750017	0.446759075
2.76250029	0.447712421
2.76750016	0.448071927
2.77250004	0.44704029
2.77750015	0.447289586
2.78250027	0.448644996
2.78750014	0.447291017
2.79250002	0.447683573
2.79750013	0.448622942
2.80250025	0.447125614
2.80750012	0.447589546
2.81250024	0.448288679
2.81750011	0.446737379
2.82249999	0.447463721
2.82750011	0.447835326
2.83250022	0.447448015
2.83750033	0.446550936
2.84249997	0.448989511
2.84750009	0.447729588
2.85250020	0.447755933
2.85750032	0.448013127
2.86250019	0.447523564
2.86750007	0.447255224
2.87250018	0.448743463
2.87750006	0.447493762
2.88250017	0.447238445
2.88750029	0.448581547
2.89250016	0.447001278
2.89750004	0.447010607
2.90250015	0.448841333
2.90750027	0.447749138
2.91250014	0.44741407
2.91750002	0.44824791
2.92250013	0.447198331
2.92750025	0.447082281
2.93250012	0.448328137
2.93750024	0.446889103
2.94250011	0.447547466
2.94749999	0.447573394
2.95250011	0.448486805
2.95750022	0.447888106
2.96250033	0.449536055
2.96749997	0.447976947
2.97250009	0.446990043
2.97750020	0.449195772
2.98250032	0.448006123
2.98750019	0.446910411
2.99250007	0.448972046
2.99750018	0.447624952
3.00250006	0.447160274
3.00750017	0.449525118
3.01250029	0.448430687
3.01750016	0.447333425
3.02250004	0.447814494
3.02750015	0.447603852
3.03250027	0.447243869
3.03750014	0.448467195
3.04250002	0.447656244
3.04750013	0.446801186
3.05250025	0.448481113
3.05750012	0.448016018
3.06250024	0.447355866
3.06750011	0.44822824
3.07249999	0.449350327
3.07750011	0.446897864
3.08250022	0.448597521
3.08750033	0.448232055
3.09249997	0.447253019
3.09750009	0.449071258
3.10250020	0.448200285
3.10750032	0.447254688
3.11250019	0.448617846
3.11750007	0.447894871
3.12250018	0.44781974
3.12750006	0.448515266
3.13250017	0.448804796
3.13750029	0.447548807
3.14250016	0.448308468
3.14750004	0.447979093
3.15250015	0.446976632
3.15750027	0.447892875
3.16250014	0.44801268
3.16750002	0.44763732
3.17250013	0.448330224
3.17750025	0.449501038
3.18250012	0.447491407
3.18750024	0.448652029
3.19250011	0.448535681
3.19749999	0.447542518
3.20250011	0.448179603
3.20750022	0.44801867
3.21250033	0.447550058
3.21749997	0.448372573
3.22250009	0.448503166
3.22750020	0.447512448
3.23250032	0.448549807
3.23750019	0.448651671
3.24250007	0.447061986
3.24750018	0.447326869
3.25250006	0.449213892
3.25750017	0.44809705
3.26250029	0.44831562
3.26750016	0.448034376
3.27250004	0.447503626
3.27750015	0.448022157
3.28250027	0.448248237
3.28750014	0.44732827
3.29250002	0.447864771
3.29750013	0.449478805
3.30250025	0.447125047
3.30750012	0.447419137
3.31250024	0.448261052
3.31750011	0.447294235
3.32249999	0.447751343
3.32750011	0.44892633
3.33250022	0.447917193
3.33750033	0.447627723
3.34249997	0.450231403
3.34750009	0.447556645
3.35250020	0.448799461
3.35750032	0.449122012
3.36250019	0.448150605
3.36750007	0.4480398
3.37250018	0.448788494
3.37750006	0.448063314
3.38250017	0.447980553
3.38750029	0.448538035
3.39250016	0.447394073
3.39750004	0.447933883
3.40250015	0.449101657
3.40750027	0.447433025
3.41250014	0.447898001
3.41750026	0.448395133
3.42250013	0.447860897
3.42750025	0.448091775
3.43250012	0.448494226
3.43750024	0.448126018
3.44250035	0.447684914
3.44749999	0.449353784
3.45250011	0.448875368
3.45750022	0.447795302
3.46250033	0.449540615
3.46750021	0.447369993
3.47250009	0.447820932
3.47750020	0.448436469
3.48250032	0.448465109
3.48750019	0.448026061
3.49250031	0.448644489
3.49750018	0.448429257
3.50250006	0.448310733
3.50750017	0.449239135
3.51250029	0.448535055
3.51750040	0.44825986
3.52250004	0.448727191
3.52750015	0.448080838
3.53250027	0.448198676
3.53750014	0.448938012
3.54250026	0.448511601
3.54750013	0.4481363
3.55250025	0.449143112
3.55750012	0.447902024
3.56250024	0.447696626
3.56750035	0.449261934
3.57249999	0.448527902
3.57750011	0.447492421
3.58250022	0.448701561
3.58750033	0.449484855
3.59250021	0.447419494
3.59750009	0.448780328
3.60250020	0.448636174
3.60750032	0.448755682
3.61250019	0.44872582
3.61750031	0.449173391
3.62250018	0.447626054
3.62750006	0.448463678
3.63250017	0.449538827
3.63750029	0.448118031
3.64250040	0.449067295
3.64750004	0.448200673
3.65250015	0.447899073
3.65750027	0.448638827
3.66250014	0.448715717
3.66750026	0.447930396
3.67250013	0.448008567
3.67750025	0.449578255
3.68250012	0.448364228
3.68750024	0.447967798
3.69250035	0.449379295
3.69749999	0.447779059
3.70250011	0.448842883
3.70750022	0.448521495
3.71250033	0.446677774
3.71750021	0.448279828
3.72250009	0.449354947
3.72750020	0.448160619
3.73250032	0.449258357
3.73750019	0.449178547
3.74250031	0.448271632
3.74750018	0.448031843
3.75250006	0.449078023
3.75750017	0.447832674
3.76250029	0.448473364
3.76750040	0.449251592
3.77250004	0.447586894
3.77750015	0.44768247
3.78250027	0.450308114
3.78750014	0.448804647
3.79250026	0.448200047
3.79750013	0.449724376
3.80250025	0.448326618
3.80750012	0.448568314
3.81250024	0.449786514
3.81750035	0.448354185
3.82249999	0.448152751
3.82750011	0.449295104
3.83250022	0.448680461
3.83750033	0.448811412
3.84250021	0.450249136
3.84750009	0.448432535
3.85250020	0.447848439
3.85750032	0.449451208
3.86250019	0.448095024
3.86750031	0.447817922
3.87250018	0.449038208
3.87750006	0.448568106
3.88250017	0.447654009
3.88750029	0.449135989
3.89250040	0.44845438
3.89750004	0.448442429
3.90250015	0.448652834
3.90750027	0.448958695
3.91250014	0.449070036
3.91750026	0.450305194
3.92250013	0.448788166
3.92750025	0.448137879
3.93250012	0.449569821
3.93750024	0.449641585
3.94250035	0.44865945
3.94749999	0.44937712
3.95250011	0.448507637
3.95750022	0.448298067
3.96250033	0.449442744
3.96750021	0.448921114
3.97250009	0.448587954
3.97750020	0.449617028
3.98250032	0.448817641
3.98750019	0.448288202
3.99250031	0.449816644
3.99750018	0.448859274
4.00250006	0.448388606
4.00750017	0.449393064
4.01250029	0.448836982
4.01750040	0.447717249
4.02250004	0.449617326
4.02750015	0.4490242
4.03250027	0.448243678
4.03750038	0.448794454
4.04250050	0.449423164
4.04750013	0.447579622
4.05250025	0.44998306
4.05750036	0.449123979
4.06250048	0.448114812
4.06750011	0.449393243
4.07250023	0.44928506
4.07750034	0.447739601
4.08249998	0.448953629
4.08750010	0.449736625
4.09250021	0.447941452
4.09750032	0.449951977
4.10249996	0.449116975
4.10750008	0.449077129
4.11250019	0.448971421
4.11750031	0.449846119
4.12249994	0.448374778
4.12750006	0.449814022
4.13250017	0.449665248
4.13750029	0.448870093
4.14250040	0.448990256
4.14750004	0.450649172
4.15250015	0.448369414
4.15750027	0.44994545
4.16250038	0.449256361
4.16750050	0.448104858
4.17250013	0.448816598
4.17750025	0.449552238
4.18250036	0.448229224
4.18750048	0.448657066
4.19250011	0.450121284
4.19750023	0.448432952
4.20250034	0.448900431
4.20749998	0.449484289
4.21250010	0.448528081
4.21750021	0.448818833
4.22250032	0.449943483
4.22749996	0.448925078
4.23250008	0.44915241
4.23750019	0.449446559
4.24250031	0.448376894
4.24749994	0.449263215
4.25250006	0.44958353
4.25750017	0.448516041
4.26250029	0.449620903
4.26750040	0.450106204
4.27250004	0.448377729
4.27750063	0.449370444
4.28250027	0.44966954
4.28749991	0.448541343
4.29250050	0.449139565
4.29750013	0.449887365
4.30250025	0.448835969
4.30750036	0.448959649
4.31250000	0.449471027
4.31750011	0.449150652
4.32250023	0.448548913
4.32750034	0.449496478
4.33249998	0.449433744
4.33750010	0.448820233
4.34250021	0.451231778
4.34750032	0.448929846
4.35250044	0.448519707
4.35750008	0.450044125
4.36250019	0.44920674
4.36750031	0.44878912
4.37249994	0.450452566
4.37750053	0.448770851
4.38250017	0.448200017
4.38749981	0.449144155
4.39250040	0.449035525
4.39750004	0.447896183
4.40250063	0.449277967
4.40750027	0.449265361
4.41249991	0.448866695
4.41750050	0.44954893
4.42250013	0.449428946
4.42750025	0.44876197
4.43250036	0.449909002
4.43750000	0.449279696
4.44250011	0.448137224
4.44750023	0.449582875
4.45250034	0.448869467
4.45749998	0.448582619
4.46250010	0.450350374
4.46750021	0.449541897
4.47250032	0.447870612
4.47750044	0.449569434
4.48250008	0.449418902
4.48750019	0.448409051
4.49250031	0.449825466
4.49749994	0.449521571
4.50250053	0.448960811
4.50750017	0.449926198
4.51249981	0.448937208
4.51750040	0.448208481
4.52250004	0.449334443
4.52750063	0.448254466
4.53250027	0.448642641
4.53749991	0.449473172
4.54250050	0.448569834
4.54750013	0.448455989
4.55250025	0.449841946
4.55750036	0.450160146
4.56250000	0.448243022
4.56750011	0.449815482
4.57250023	0.449116319
4.57750034	0.448463917
4.58249998	0.449287236
4.58750010	0.44903478
4.59250021	0.44875747
4.59750032	0.449352831
4.60250044	0.449623615
4.60750008	0.448654056
4.61250019	0.4492324
4.61750031	0.449617207
4.62249994	0.448725551
4.62750053	0.449394614
4.63250017	0.450615525
4.63749981	0.449318856
4.64250040	0.449865341
4.64750004	0.450425327
4.65250063	0.447939545
4.65750027	0.449093312
4.66249991	0.449694604
4.66750050	0.448495328
4.67250013	0.448300988
4.67750025	0.450325728
4.68250036	0.449463874
4.68750000	0.449447811
4.69250011	0.450630724
4.69750023	0.448791534
4.70250034	0.449593604
4.70749998	0.44907257
4.71250010	0.448603362
4.71750021	0.448630095
4.72250032	0.450158835
4.72750044	0.448714256
4.73250008	0.448584855
4.73750019	0.450632244
4.74250031	0.449107736
4.74749994	0.448879033
4.75250053	0.450677156
4.75750017	0.448889524
4.76249981	0.448614329
4.76750040	0.44950226
4.77250004	0.448363483
4.77750063	0.448644579
4.78250027	0.449896187
4.78749991	0.448828936
4.79250050	0.448687404
4.79750013	0.450158566
4.80250025	0.448370576
4.80750036	0.448923647
4.81250000	0.44930923
4.81750011	0.449423939
4.82250023	0.448453873
4.82750034	0.449791133
4.83249998	0.448950678
4.83750010	0.448225617
4.84250021	0.449674189
4.84750032	0.449184895
4.85250044	0.448689193
4.85750008	0.449875116
4.86250019	0.449349642
4.86750031	0.448572546
4.87249994	0.449234515
4.87750053	0.448949665
4.88250017	0.448677748
4.88750029	0.450208366
4.89250040	0.449895233
4.89750004	0.448495507
4.90250063	0.450307101
4.90750027	0.449221522
4.91250038	0.448625982
4.91750050	0.450496227
4.92250013	0.448909044
4.92750025	0.448980629
4.93250036	0.449610114
4.93750048	0.450000852
4.94250011	0.448711604
4.94750023	0.449913651
4.95250034	0.449288994
4.95749998	0.448861182
4.96250057	0.449682713
4.96750021	0.449519485
4.97250032	0.448411942
4.97750044	0.449770242
4.98250008	0.449270248
4.98750067	0.448802143
4.99250031	0.450106889
4.99749994	0.450126618
5.00250053	0.448944092
5.00750017	0.449483752
5.01250029	0.450369537
5.01750040	0.449107438
5.02250004	0.450238228
5.02750063	0.449508071
5.03250027	0.44847241
5.03750038	0.449608147
5.04250050	0.450054407
5.04750013	0.449041367
5.05250025	0.449564993
5.05750036	0.450198472
5.06250048	0.448775977
5.06750011	0.44987157
5.07250023	0.449891448
5.07750034	0.44893992
5.08249998	0.449783534
5.08750057	0.449828655
5.09250021	0.448358059
5.09750032	0.449694157
5.10250044	0.450313956
5.10750008	0.448892206
5.11250067	0.449484706
5.11750031	0.449952692
5.12249994	0.449035436
5.12750053	0.449183285
5.13250017	0.450265497
5.13750029	0.448674202
5.14250040	0.449187964
5.14750004	0.449426591
5.15250063	0.449627996
5.15750027	0.450179428
5.16250038	0.451041818
5.16750050	0.449332118
5.17250013	0.449737251
5.17750025	0.449491501
5.18250036	0.448679149
5.18750048	0.448687911
5.19250011	0.45011422
5.19750023	0.448555082
5.20250034	0.449092627
5.20749998	0.449250668
5.21250057	0.448782086
5.21750021	0.44955045
5.22250032	0.450574279
5.22750044	0.448863298
5.23250008	0.449289113
5.23750067	0.450422674
5.24250031	0.449448615
5.24749994	0.448478639
5.25250053	0.450752854
5.25750017	0.449644148
5.26250029	0.448971838
5.26750040	0.450454593
5.27250004	0.448841542
5.27750063	0.448465437
5.28250027	0.450577766
5.28750038	0.448936224
5.29250050	0.449568361
5.29750013	0.45038724
5.30250025	0.448813736
5.30750036	0.449243903
5.31250048	0.449587643
5.31750011	0.449328184
5.32250023	0.448847443
5.32750034	0.449747413
5.33249998	0.449341297
5.33750057	0.449668348
5.34250021	0.450309366
5.34750032	0.44923234
5.35250044	0.448891372
5.35750008	0.449828088
5.36250067	0.449504674
5.36750031	0.448195726
5.37249994	0.449976236
5.37750053	0.450733781
5.38250017	0.448442876
5.38750029	0.44989574
5.39250040	0.449236602
5.39750004	0.448473215
5.40250063	0.450183928
5.40750027	0.449580997
5.41250038	0.447963655
5.41750050	0.450161666
5.42250013	0.449874848
5.42750025	0.448703498
5.43250036	0.450660825
5.43750048	0.449748844
5.44250011	0.448406071
5.44750023	0.44976607
5.45250034	0.449118793
5.45749998	0.448428541
5.46250057	0.450197846
5.46750021	0.449481428
5.47250032	0.448484898
5.47750044	0.450030059
5.48250008	0.449957281
5.48750067	0.448496521
5.49250031	0.449972659
5.49749994	0.44970727
5.50250053	0.448977172
5.50750017	0.449447721
5.51250029	0.450796962
5.51750040	0.44892931
5.52250004	0.450116158
5.52750063	0.449310273
5.53250027	0.449437171
5.53750038	0.449842602
5.54250050	0.44948405
5.54750013	0.449283063
5.55250025	0.449299783
5.55750036	0.450330943
5.56250048	0.448678851
5.56750011	0.449700803
5.57250023	0.450342357
5.57750034	0.448707193
5.58249998	0.449629128
5.58750057	0.449582428
5.59250021	0.448391616
5.59750032	0.449804157
5.60250044	0.449303836
5.60750008	0.44891268
5.61250067	0.44937703
5.61750031	0.44928655
5.62249994	0.447769493
5.62750053	0.449314654
5.63250017	0.450300485
5.63750029	0.448804349
5.64250040	0.449505597
5.64750004	0.450120896
5.65250063	0.449084908
5.65750027	0.449343026
5.66250038	0.45051527
5.66750050	0.449993819
5.67250013	0.450292766
5.67750025	0.451503843
5.68250036	0.449506402
5.68750048	0.450014472
5.69250011	0.451231778
5.69750023	0.448745281
5.70250034	0.449337006
5.70749998	0.450298727
5.71250057	0.449133694
5.71750021	0.449854761
5.72250032	0.450740397
5.72750044	0.449013561
5.73250008	0.449702978
5.73750067	0.449784488
5.74250031	0.449243695
5.74749994	0.449722111
5.75250053	0.451055467
5.75750017	0.4488599
5.76250029	0.448919654
5.76750040	0.451077759
5.77250004	0.450064242
5.77750063	0.449318171
5.78250027	0.451186419
5.78750038	0.450184315
5.79250050	0.448811978
5.79750013	0.449725419
5.80250025	0.449124545
5.80750036	0.449491769
5.81250048	0.449910015
5.81750011	0.44950977
5.82250023	0.4495655
5.82750034	0.450434983
5.83249998	0.449272543
5.83750057	0.449251652
5.84250021	0.449829876
5.84750032	0.448885799
5.85250044	0.448658943
5.85750008	0.450661361
5.86250067	0.449563116
5.86750031	0.448683977
5.87249994	0.450175911
5.87750053	0.449744165
5.88250017	0.448330462
5.88750029	0.450854868
5.89250040	0.449785262
5.89750004	0.449726701
5.90250063	0.449989289
5.90750027	0.449623376
5.91250038	0.448732108
5.91750050	0.450037956
5.92250013	0.449050218
5.92750025	0.449002147
5.93250036	0.449594498
5.93750048	0.449837446
5.94250011	0.449055165
5.94750023	0.449748278
5.95250034	0.449777722
5.95749998	0.449133694
5.96250057	0.450489849
5.96750021	0.449817359
5.97250032	0.44916448
5.97750044	0.449983835
5.98250008	0.449424386
5.98750067	0.448989391
5.99250031	0.450249672
5.99749994	0.450469941
6.00250053	0.448697627
6.00750017	0.450651556
6.01250029	0.450061649
6.01750040	0.449611634
6.02250004	0.450631827
6.02750063	0.449180961
6.03250027	0.449284136
6.03750038	0.450369477
6.04250050	0.450181246
6.04750013	0.44937864
6.05250025	0.4506329
6.05750036	0.44968912
6.06250048	0.449080467
6.06750011	0.450195879
6.07250023	0.44930318
6.07750034	0.448581845
6.08249998	0.449774623
6.08750057	0.45019573
6.09250021	0.449076682
6.09750032	0.449522793
6.10250044	0.450258523
6.10750008	0.44957909
6.11250067	0.449830681
6.11750031	0.450039744
6.12249994	0.449416369
6.12750053	0.450270236
6.13250017	0.450165182
6.13750029	0.448991656
6.14250040	0.44985038
6.14750004	0.449623019
6.15250063	0.449018478
6.15750027	0.449594528
6.16250038	0.449509263
6.16750050	0.449037552
6.17250013	0.449866742
6.17750025	0.450222462
6.18250036	0.449062586
6.18750048	0.449414104
6.19250011	0.450480521
6.19750023	0.449139983
6.20250034	0.449887514
6.20749998	0.450106114
6.21250057	0.449290663
6.21750021	0.448739052
6.22250032	0.449517399
6.22750044	0.448860049
6.23250008	0.449722797
6.23750067	0.450830311
6.24250031	0.449111551
6.24749994	0.449549973
6.25250053	0.45054999
6.25750017	0.449400365
6.26250029	0.448888212
6.26750040	0.450052053
6.27250004	0.449353606
6.27750063	0.44930777
6.28250027	0.450488538
6.28750038	0.449014694
6.29250050	0.449731022
6.29750013	0.449925631
6.30250025	0.449932903
6.30750036	0.449279994
6.31250048	0.450994104
6.31750011	0.449681908
6.32250023	0.449554354
6.32750034	0.450360805
6.33249998	0.449456811
6.33750057	0.448971897
6.34250021	0.450102091
6.34750032	0.449787676
6.35250044	0.449973583
6.35750008	0.449949533
6.36250067	0.449720174
6.36750031	0.449734241
6.37249994	0.450504631
6.37750053	0.449093103
6.38250017	0.449337691
6.38750029	0.450053901
6.39250040	0.449797183
6.39750004	0.449276567
6.40250063	0.450462014
6.40750027	0.449121058
6.41250038	0.449341863
6.41750050	0.450251609
6.42250013	0.449557304
6.42750025	0.449546933
6.43250036	0.45084694
6.43750048	0.449313164
6.44250011	0.448713243
6.44750023	0.449597061
6.45250034	0.450050443
6.45749998	0.448691219
6.46250057	0.449986577
6.46750021	0.44985953
6.47250032	0.447723001
6.47750044	0.449448645
6.48250008	0.450266808
6.48750067	0.449445099
6.49250031	0.450547248
6.49749994	0.45015505
6.50250053	0.449925989
6.50750017	0.450105399
6.51250029	0.449648082
6.51750040	0.448836356
6.52250004	0.450413853
6.52750063	0.450857908
6.53250027	0.449086875
6.53750038	0.449798167
6.54250050	0.450024426
6.54750013	0.448900104
6.55250025	0.449902833
6.55750036	0.450494379
6.56250048	0.449237615
6.56750011	0.450260729
6.57250023	0.449268788
6.57750034	0.449195355
6.58249998	0.45030883
6.58750057	0.449784607
6.59250021	0.449101597
6.59750032	0.449826658
6.60250044	0.450229287
6.60750008	0.448978841
6.61250067	0.449980766
6.61750031	0.450799823
6.62249994	0.44901225
6.62750053	0.450320751
6.63250017	0.450731367
6.63750029	0.449602157
6.64250040	0.450548679
6.64750004	0.451467365
6.65250063	0.449850828
6.65750027	0.449997574
6.66250038	0.450710744
6.66750050	0.449821442
6.67250013	0.449444592
6.67750025	0.449844807
6.68250036	0.449581415
6.68750048	0.450262457
6.69250011	0.449102491
6.69750023	0.449150264
6.70250034	0.449179262
6.70749998	0.450630635
6.71250057	0.448548526
6.71750021	0.449914455
6.72250032	0.450002194
6.72750044	0.449613541
6.73250008	0.450464964
6.73750067	0.450001985
6.74250031	0.449494779
6.74749994	0.449804157
6.75250053	0.450297684
6.75750017	0.449118882
6.76250029	0.449442327
6.76750040	0.450704932
6.77250004	0.449163765
6.77750063	0.449700356
6.78250027	0.450346202
6.78750038	0.448982388
6.79250050	0.449840874
6.79750013	0.450067699
6.80250025	0.450181544
6.80750036	0.449366242
6.81250048	0.450708985
6.81750011	0.449407905
6.82250023	0.449598193
6.82750034	0.450684458
6.83249998	0.449499726
6.83750057	0.449127823
6.84250021	0.450650841
6.84750080	0.449766964
6.85250044	0.450121015
6.85750008	0.450427383
6.86250067	0.449733734
6.86750031	0.449005127
6.87250042	0.451581001
6.87750053	0.449369818
6.88250017	0.449293435
6.88750029	0.450841606
6.89250040	0.449629247
6.89750052	0.448896855
6.90250063	0.450841337
6.90750027	0.449914664
6.91250038	0.449730903
6.91750050	0.451432914
6.92250061	0.450283736
6.92750025	0.448851168
6.93250036	0.449805528
6.93750048	0.449634999
6.94250011	0.449144244
6.94750071	0.450121343
6.95250034	0.449784994
6.95749998	0.449655831
6.96250057	0.449941009
6.96750021	0.449809909
6.97250080	0.449145049
6.97750044	0.450624108
6.98250008	0.450125068
6.98750067	0.449321121
6.99250031	0.450925052
6.99750042	0.450936526
7.00250053	0.449159175
7.00750017	0.450547516
7.01250029	0.449662447
7.01750040	0.448690087
7.02250052	0.450658888
7.02750063	0.449602425
7.03250027	0.448855102
7.03750038	0.450087577
7.04250050	0.450216502
7.04750061	0.448576868
7.05250025	0.449634224
7.05750036	0.450389564
7.06250048	0.449103117
7.06750011	0.45028615
7.07250071	0.451152295
7.07750034	0.449583858
7.08249998	0.44972226
7.08750057	0.450211883
7.09250021	0.449042469
7.09750080	0.450110585
7.10250044	0.450078607
7.10750008	0.449632555
7.11250067	0.449857414
7.11750031	0.44955641
7.12250042	0.449513167
7.12750053	0.449815691
7.13250017	0.450795651
7.13750029	0.449116409
7.14250040	0.449514955
7.14750052	0.449787885
7.15250063	0.448731244
7.15750027	0.450621694
7.16250038	0.449921846
7.16750050	0.448706418
7.17250061	0.450365037
7.17750025	0.450760454
7.18250036	0.449418068
7.18750048	0.450096607
7.19250011	0.450051159
7.19750071	0.449228585
7.20250034	0.450040013
7.20749998	0.451016396
7.21250057	0.449778438
7.21750021	0.450809568
7.22250080	0.450953782
7.22750044	0.449145079
7.23250008	0.449446797
7.23750067	0.450152099
7.24250031	0.450052023
7.24750042	0.450502962
7.25250053	0.449893624
7.25750017	0.449758083
7.26250029	0.449906766
7.26750040	0.450679481
7.27250052	0.44930476
7.27750063	0.449754417
7.28250027	0.45137772
7.28750038	0.449547857
7.29250050	0.44964695
7.29750061	0.450928032
7.30250025	0.449720919
7.30750036	0.45023942
7.31250048	0.450041056
7.31750011	0.449462235
7.32250071	0.450005412
7.32750034	0.450175732
7.33249998	0.44889307
7.33750057	0.449389726
7.34250021	0.450957358
7.34750080	0.44984749
7.35250044	0.449758083
7.35750008	0.45054239
7.36250067	0.450249493
7.36750031	0.449407727
7.37250042	0.450713038
7.37750053	0.448713779
7.38250017	0.449221015
7.38750029	0.450729728
7.39250040	0.449526876
7.39750052	0.450033784
7.40250063	0.450017303
7.40750027	0.449428886
7.41250038	0.449853092
7.41750050	0.450629234
7.42250061	0.449583411
7.42750025	0.449562609
7.43250036	0.450139314
7.43750048	0.44895047
7.44250011	0.449528158
7.44750071	0.449817389
7.45250034	0.449153394
7.45749998	0.450054705
7.46250057	0.450000793
7.46750021	0.449478567
7.47250080	0.449431568
7.47750044	0.450593263
7.48250008	0.449638993
7.48750067	0.44916895
7.49250031	0.450313926
7.49750042	0.450500101
7.50250053	0.44986859
7.50750017	0.450273395
7.51250029	0.450150341
7.51750040	0.449624062
7.52250052	0.450308442
7.52750063	0.450097024
7.53250027	0.449588299
7.53750038	0.450495839
7.54250050	0.450234324
7.54750061	0.450112462
7.55250025	0.450418383
7.55750036	0.450200826
7.56250048	0.449012518
7.56750011	0.449787557
7.57250071	0.449892402
7.57750034	0.450051218
7.58249998	0.450875819
7.58750057	0.449567318
7.59250021	0.449510664
7.59750080	0.450677782
7.60250044	0.450428248
7.60750008	0.44936645
7.61250067	0.450018048
7.61750031	0.451352328
7.62250042	0.448727518
7.62750053	0.450048178
7.63250017	0.448731124
7.63750029	0.449224979
7.64250040	0.450759739
7.64750052	0.449838907
7.65250063	0.449243665
7.65750027	0.45062983
7.66250038	0.45099327
7.66750050	0.449150562
7.67250061	0.450300813
7.67750025	0.450379163
7.68250036	0.449455202
7.68750048	0.449626893
7.69250011	0.451038271
7.69750071	0.449369371
7.70250034	0.451302975
7.70749998	0.451577723
7.71250057	0.449787736
7.71750021	0.450506896
7.72250080	0.449971646
7.72750044	0.44953692
7.73250008	0.44949165
7.73750067	0.450156957
7.74250031	0.449066609
7.74750042	0.450297356
7.75250053	0.4498052
7.75750017	0.448889375
7.76250029	0.449967086
7.76750040	0.449550778
7.77250052	0.449558824
7.77750063	0.45025906
7.78250027	0.450552106
7.78750038	0.449414641
7.79250050	0.450074732
7.79750061	0.449416548
7.80250025	0.449950427
7.80750036	0.450532824
7.81250048	0.450097531
7.81750011	0.449517906
7.82250071	0.450303197
7.82750034	0.450545251
7.83249998	0.449799836
7.83750057	0.449202746
7.84250021	0.450667203
7.84750080	0.449445188
7.85250044	0.449844658
7.85750008	0.45092383
7.86250067	0.450075358
7.86750031	0.449962288
7.87250042	0.450859398
7.87750053	0.449831009
7.88250017	0.449940175
7.88750029	0.451080799
7.89250040	0.449400872
7.89750052	0.450002432
7.90250063	0.450439751
7.90750027	0.449649394
7.91250038	0.449455649
7.91750050	0.450546563
7.92250061	0.4495731
7.92750025	0.449675262
7.93250036	0.450743496
7.93750048	0.449731082
7.94250011	0.450681657
7.94750071	0.450631738
7.95250034	0.450349361
7.95749998	0.449084491
7.96250057	0.450850248
7.96750021	0.449873895
7.97250080	0.449447632
7.97750044	0.450932324
7.98250008	0.450065523
7.98750067	0.44992128
7.99250031	0.450603604
7.99750042	0.449785739
8.00250053	0.44967413
8.00750065	0.451211482
8.01250076	0.450066596
8.01749992	0.449723065
8.02250099	0.451074481
8.02750015	0.449813157
8.03250027	0.449131697
8.03750038	0.451550305
8.04250050	0.44978255
8.04750061	0.449001163
8.05250073	0.451077849
8.05749989	0.449953705
8.06250095	0.449858248
8.06750011	0.450351119
8.07250023	0.449501425
8.07750034	0.449790686
8.08250046	0.450844765
8.08750057	0.449742407
8.09250069	0.449306697
8.09750080	0.450527042
8.10249996	0.449254364
8.10750008	0.449296534
8.11250019	0.451158941
8.11750031	0.449556291
8.12250042	0.449510187
8.12750053	0.450735658
8.13250065	0.450628668
8.13750076	0.449716896
8.14249992	0.451483131
8.14750099	0.44987011
8.15250015	0.449366778
8.15750027	0.450395674
8.16250038	0.45007357
8.16750050	0.449789971
8.17250061	0.450747043
8.17750073	0.45066604
8.18249989	0.448918581
8.18750095	0.450709134
8.19250011	0.45152393
8.19750023	0.449573219
8.20250034	0.450819045
8.20750046	0.451135606
8.21250057	0.450160772
8.21750069	0.450651497
8.22250080	0.450269252
8.22749996	0.449714154
8.23250008	0.451179177
8.23750019	0.449573427
8.24250031	0.449485272
8.24750042	0.45044595
8.25250053	0.450906009
8.25750065	0.449477166
8.26250076	0.451292545
8.26749992	0.449987561
8.27250099	0.449446589
8.27750015	0.450194031
8.28250027	0.450361311
8.28750038	0.448932767
8.29250050	0.45008558
8.29750061	0.449910998
8.30250073	0.449228734
8.30749989	0.451016575
8.31250095	0.450149983
8.31750011	0.449940682
8.32250023	0.450709164
8.32750034	0.450406134
8.33250046	0.44917801
8.33750057	0.44998169
8.34250069	0.45069173
8.34750080	0.449919015
8.35249996	0.451038867
8.35750008	0.450116962
8.36250019	0.449465394
8.36750031	0.450180858
8.37250042	0.450317204
8.37750053	0.449716538
8.38250065	0.450354368
8.38750076	0.450457752
8.39249992	0.449389339
8.39750099	0.450321555
8.40250015	0.450903326
8.40750027	0.449444234
8.41250038	0.450241715
8.41750050	0.450514466
8.42250061	0.44913581
8.42750073	0.450578123
8.43249989	0.450178444
8.43750095	0.449522495
8.44250011	0.450483173
8.44750023	0.450684577
8.45250034	0.449621886
8.45750046	0.450239599
8.46250057	0.450855732
8.46750069	0.450002074
8.47250080	0.449878097
8.47749996	0.450689107
8.48250008	0.450197846
8.48750019	0.4504264
8.49250031	0.450323999
8.49750042	0.450267494
8.50250053	0.45035404
8.50750065	0.451313585
8.51250076	0.450295746
8.51749992	0.449267656
8.52250099	0.45094198
8.52750015	0.449244648
8.53250027	0.450171351
8.53750038	0.451057881
8.54250050	0.45033589
8.54750061	0.449442804
8.55250073	0.452002853
8.55749989	0.449724555
8.56250000	0.450178027
8.56750107	0.450669229
8.57250023	0.449428707
8.57750034	0.449219644
8.58250046	0.45056209
8.58749962	0.451244086
8.59250069	0.450355351
8.59750080	0.451467753
8.60249996	0.449925661
8.60750008	0.450023323
8.61250019	0.451129407
8.61750126	0.450570375
8.62250042	0.449904293
8.62750053	0.45119068
8.63250065	0.450332969
8.63749981	0.450927317
8.64250088	0.450846404
8.64750099	0.45022887
8.65250015	0.450289428
8.65750027	0.45098263
8.66250038	0.450720638
8.66750050	0.44932428
8.67250061	0.450247169
8.67750073	0.450834602
8.68249989	0.449231446
8.68750000	0.451201052
8.69250107	0.451114416
8.69750023	0.449400455
8.70250034	0.451760471
8.70750046	0.450773299
8.71249962	0.449598104
8.71750069	0.451297522
8.72250080	0.450010866
8.72749996	0.449613869
8.73250008	0.45082441
8.73750019	0.450242758
8.74250126	0.449966222
8.74750042	0.451059878
8.75250053	0.450461835
8.75750065	0.450066268
8.76249981	0.45069769
8.76750088	0.450843006
8.77250099	0.450021505
8.77750015	0.451733589
8.78250027	0.450738937
8.78750038	0.449978173
8.79250050	0.45155704
8.79750061	0.450606316
8.80250073	0.449556023
8.80749989	0.451261491
8.81250000	0.451123923
8.81750107	0.449256569
8.82250023	0.450256467
8.82750034	0.4503842
8.83250046	0.449773669
8.83749962	0.451305687
8.84250069	0.450385749
8.84750080	0.450375706
8.85249996	0.451267898
8.85750008	0.44977808
8.86250019	0.449869394
8.86750126	0.451191366
8.87250042	0.450661153
8.87750053	0.449858517
8.88250065	0.450982511
8.88749981	0.451458752
8.89250088	0.450529724
8.89750099	0.450861782
8.90250015	0.451002806
8.90750027	0.449822992
8.91250038	0.450770587
8.91750050	0.45037964
8.92250061	0.449957907
8.92750073	0.45024088
8.93249989	0.450981319
8.93750000	0.449426264
8.94250107	0.450163305
8.94750023	0.451385975
8.95250034	0.450088829
8.95750046	0.450800657
8.96249962	0.451270878
8.96750069	0.44965905
8.97250080	0.451300174
8.97749996	0.450484425
8.98250008	0.450236589
8.98750019	0.450781733
8.99250126	0.451706439
8.99750042	0.450061798
9.00250053	0.45008117
9.00750065	0.451488078
9.01249981	0.450158626
9.01750088	0.450235367
9.02250099	0.450684011
9.02750015	0.450249672
9.03250027	0.450328827
9.03750038	0.45131737
9.04250050	0.450189143
9.04750061	0.450001121
9.05250073	0.452137649
9.05749989	0.449842602
9.06250000	0.450731695
9.06750107	0.451056451
9.07250023	0.450240821
9.07750034	0.450087726
9.08250046	0.452182412
9.08749962	0.450411797
9.09250069	0.450956196
9.09750080	0.451178223
9.10249996	0.450173408
9.10750008	0.450371325
9.11250019	0.451652646
9.11750126	0.450517684
9.12250042	0.450537235
9.12750053	0.451792419
9.13250065	0.450709343
9.13749981	0.450537056
9.14250088	0.451126307
9.14750099	0.449892223
9.15250015	0.449798852
9.15750027	0.451604456
9.16250038	0.450469971
9.16750050	0.450049132
9.17250061	0.451628059
9.17750073	0.45098567
9.18249989	0.451101929
9.18750000	0.451277942
9.19250107	0.450771898
9.19750023	0.450339824
9.20250034	0.451826751
9.20750046	0.45065555
9.21249962	0.449485213
9.21750069	0.45137316
9.22250080	0.450265318
9.22749996	0.45018968
9.23250008	0.451506078
9.23750019	0.450758189
9.24250126	0.450817019
9.24750042	0.451226711
9.25250053	0.450355351
9.25750065	0.450530231
9.26249981	0.452084988
9.26750088	0.451026857
9.27250099	0.449901104
9.27750015	0.452208549
9.28250027	0.450961351
9.28750038	0.450426042
9.29250050	0.451528698
9.29750061	0.450811476
9.30250073	0.450471699
9.30749989	0.451296151
9.31250000	0.450966597
9.31750107	0.449941367
9.32250023	0.451589495
9.32750034	0.450733393
9.33250046	0.45102495
9.33749962	0.451803088
9.34250069	0.451452762
9.34750080	0.449747533
9.35249996	0.451581121
9.35750008	0.45153302
9.36250019	0.450803667
9.36750126	0.451153308
9.37250042	0.451763362
9.37750053	0.450165391
9.38250065	0.451295316
9.38749981	0.450546742
9.39250088	0.450066894
9.39750099	0.451614708
9.40250015	0.450526595
9.40750027	0.450608075
9.41250038	0.450984389
9.41750050	0.451307923
9.42250061	0.450810045
9.42750073	0.451383978
9.43249989	0.451054841
9.43750000	0.450543135
9.44250107	0.451459169
9.44750023	0.450785846
9.45250034	0.450269163
9.45750046	0.451542497
9.46249962	0.451050788
9.46750069	0.450742781
9.47250080	0.451683819
9.47749996	0.451082468
9.48250008	0.450276941
9.48750019	0.450973213
9.49250126	0.451518118
9.49750042	0.450312138
9.50250053	0.451250583
9.50750065	0.450970411
9.51249981	0.450706631
9.51750088	0.451535672
9.52250099	0.451393545
9.52750015	0.450400412
9.53250027	0.450591862
9.53750038	0.452181429
9.54250050	0.450578779
9.54750061	0.450926662
9.55250073	0.451740742
9.55749989	0.450493425
9.56250000	0.450470716
9.56750107	0.451210499
9.57250023	0.450403452
9.57750034	0.451185167
9.58250046	0.451885909
9.58749962	0.450317293
9.59250069	0.450616539
9.59750080	0.451632857
9.60249996	0.451092839
9.60750008	0.451697677
9.61250019	0.451209664
9.61750126	0.45042342
9.62250042	0.450867504
9.62750053	0.451182336
9.63250065	0.450500518
9.63749981	0.451059014
9.64250088	0.4513295
9.64750099	0.450419694
9.65250015	0.451438993
9.65750027	0.451191038
9.66250038	0.450277031
9.66750050	0.450623035
9.67250061	0.451865882
9.67750073	0.451297075
9.68249989	0.451413363
9.68750000	0.451848567
9.69250107	0.450304776
9.69750023	0.451033115
9.70250034	0.45132643
9.70750046	0.451012611
9.71249962	0.450939477
9.71750069	0.451661408
9.72250080	0.451162159
9.72749996	0.450772435
9.73250008	0.451636612
9.73750019	0.450749874
9.74250126	0.450523585
9.74750042	0.451529115
9.75250053	0.450280905
9.75750065	0.450459957
9.76250076	0.45198378
9.76750088	0.450447887
9.77250099	0.450098634
9.77750015	0.452265561
9.78250027	0.450908274
9.78750134	0.450491369
9.79250050	0.451603442
9.79750061	0.450753659
9.80250073	0.451074094
9.80749989	0.451847851
9.81250095	0.451354563
9.81750107	0.450925797
9.82250023	0.451212615
9.82750034	0.450722128
9.83250046	0.450317204
9.83750057	0.452325374
9.84250069	0.45065254
9.84750080	0.45123753
9.85249996	0.451393664
9.85750008	0.45077771
9.86250114	0.450842679
9.86750126	0.451804549
9.87250042	0.450192392
9.87750053	0.450514525
9.88250065	0.452048868
9.88750076	0.451245785
9.89250088	0.450895667
9.89750099	0.452134877
9.90250015	0.45116818
9.90750027	0.450904429
9.91250134	0.452177614
9.91750050	0.450954497
9.92250061	0.450756222
9.92750073	0.45144859
9.93249989	0.450857192
9.93750095	0.450175673
9.94250107	0.450980246
9.94750023	0.451634944
9.95250034	0.450692356
9.95750046	0.451966971
9.96250057	0.451700807
9.96750069	0.450496197
9.97250080	0.452308774
9.97749996	0.450424671
9.98250008	0.450786859
9.98750114	0.451617301
9.99250126	0.451534927
[truncated: 4 more rows]
